## IKK $\epsilon$ and TBK1 expression in gastric cancer

Seung Eun Lee<sup>1,\*</sup>, Mineui Hong<sup>2,\*</sup>, Junhun Cho<sup>3</sup>, Jeeyun Lee<sup>4</sup>, Kyoung-Mee Kim<sup>3</sup>

<sup>1</sup>Department of Pathology, Konkuk University School of Medicine, Konkuk University Medical Center, Seoul, Korea

<sup>2</sup>Department of Pathology, Hallym University Kangnam Sacred Heart Hospital, Seoul, Korea

<sup>3</sup>Department of Pathology and Translational Genomics, Samsung Medical Center, Sungkyunkwan University School of Medicine, Seoul, Korea

<sup>4</sup>Division of Hematology-Oncology, Department of Medicine, Samsung Medical Center, Sungkyunkwan University School of Medicine, Seoul, Korea

\*These authors have contributed equally to this work

Correspondence to: Jeeyun Lee, e-mail: jyunlee@skku.edu

Kyoung-Mee Kim, e-mail: kkmkys@skku.edu

Keywords: IKK $\epsilon$ , TBK1, gastric, cancer, therapy

Received: September 22, 2015

Accepted: March 31, 2016

Published: April 28, 2016

### ABSTRACT

**Inhibitor of kappa B kinase epsilon (IKK $\epsilon$ ) and TANK-binding kinase 1 (TBK1) are non-canonical IKKs. IKK $\epsilon$  and TBK1 share the kinase domain and are similar in their ability to activate the nuclear factor-kappa B signaling pathway. IKK $\epsilon$  and TBK1 are overexpressed through multiple mechanisms in various human cancers. However, the expression of IKK $\epsilon$  and TBK1 in gastric cancer and their role in prognosis have not been studied.**

**To investigate overexpression of the IKK $\epsilon$  and TBK1 proteins in gastric cancer and their relationship with clinicopathologic factors, we performed immunohistochemical staining using a tissue microarray. Tissue microarray samples were obtained from 1,107 gastric cancer patients who underwent R0 gastrectomy with extensive lymph node dissection and adjuvant chemotherapy.**

**We identified expression of IKK $\epsilon$  in 150 (13.6%) and TBK1 in 38 (3.4%) gastric cancers. Furthermore, co-expression of IKK $\epsilon$  and TBK1 was identified in 1.5% of cases. Co-expression of IKK $\epsilon$  and TBK1 was associated with differentiated intestinal histology and earlier T stage. In a multivariate binary logistic regression model, intestinal histologic type by Lauren classification and early AJCC stage were significant predictors for expression of IKK $\epsilon$  and TBK1 proteins in gastric cancer. Changes in IKK $\epsilon$  and TBK1 expression may be involved in the development of intestinal-type gastric cancer. The overexpression of IKK $\epsilon$  and TBK1 should be considered in selected patients with intestinal-type gastric cancer.**

**In conclusion, this is the first large-scale study investigating the relationships between expression of IKK $\epsilon$  and TBK1 and clinicopathologic features of gastric cancer. The role of IKK $\epsilon$  and TBK1 in intestinal-type gastric cancer pathogenesis should be elucidated by further investigation.**

### INTRODUCTION

Gastric cancer is the third leading cause of cancer-related death worldwide. Identifying effective pathway inhibition is a key aspect of the development of targeted therapeutics. The success of trastuzumab in HER2-positive gastric cancer patients has elicited efforts to discover new molecular targets in gastric cancer.

The nuclear factor-kappa B (NF- $\kappa$ B) pathway is a key regulator that activates transcription of genes involved in the inflammatory immune response, proliferation, cell survival and cell invasion. Activation of NF- $\kappa$ B is frequently observed in solid tumors and hematological malignancies [1]. NF- $\kappa$ B complexes are retained in the cytoplasm by a family of NF- $\kappa$ B-binding proteins known as inhibitors of NF- $\kappa$ B (I $\kappa$ Bs) [1]. Various stimulants trigger activation of

the IKK (I $\kappa$ Bs kinase complex), leading to proteasomal degradation of I $\kappa$ Bs. Consequently, NF- $\kappa$ B dimers are released in the nucleus and induce transcription of target genes related to inflammation and survival.

The IKK family can be divided into two groups: canonical IKKs (IKK $\alpha$ , IKK $\beta$  and a nonenzymatic regulatory component, IKK $\gamma$ /NEMO) and non-canonical IKKs (IKK $\epsilon$  and TBK1) [2]. Although IKK $\epsilon$  and TANK-binding kinase 1 (TBK1) are characterized as activators of NF- $\kappa$ B, they are not essential for NF- $\kappa$ B activation [3, 4]. Instead, IKK $\epsilon$  and TBK1 play critical roles in antiviral response via phosphorylation and activation of transcription factors IRF3, IRF7 and STAT1 [1, 5]. Furthermore, these non-canonical IKKs are also involved in the survival, tumorigenesis and development of various cancers [6–8]. Although IKK $\epsilon$  expression is restricted to particular tissues, such as lymphoid tissues, peripheral blood lymphocytes and the pancreas [9], TBK1 is constitutively expressed in many normal tissues, including the immune cells, brain, lungs, gastrointestinal tract, and reproductive organs [10]. IKK $\epsilon$  is overexpressed through multiple mechanisms in various human cancers, such as breast, ovarian, and prostate cancer. IKK $\epsilon$  overexpression in breast and ovarian cancer was increased due to amplification or unknown mutations regulating IKK $\epsilon$  transcript levels [2, 11]. IKK $\epsilon$  has been identified as an oncogene in breast [2] and ovarian cancer [11, 12] and is associated with poor prognosis [7, 13]. Recent reports suggested that overexpression of IKK $\epsilon$  may play a role in tumorigenesis of prostatic and esophageal squamous cell carcinoma [14, 15]. TBK1's role in cancer may be due to its involvement in regulation of cell growth and proliferation, angiogenesis and oncogenic transformation [8, 16–18]. Through functional genomics, Barbie et al. [6] identified that TBK1 was essential for KRAS mutant cancer cell lines. However, subsequent studies found no relationship between oncogenic KRAS and TBK1 [19].

Thus far, the expression of IKK $\epsilon$  and TBK1 in gastric cancer and their role in prognosis have not been studied. To investigate overexpression of IKK $\epsilon$  and TBK1 in gastric cancer and their relation to clinicopathologic factors, we performed immunohistochemical staining in 1,107 resected gastric cancers using a tissue microarray approach.

## RESULTS

### Expression of IKK $\epsilon$ and TBK1 in gastric cancer

Expression of IKK $\epsilon$  and TBK1 was observed in 13.6% (150/1107) and 3.4% (38/1107) of gastric cancer patients, respectively. Associations between IKK $\epsilon$  and TBK1 expression and clinicopathological factors were evaluated (Table 1). IKK $\epsilon$  and TBK1 expression were correlated with histologic differentiation and histologic type by Lauren classification. Differentiated tumors and

intestinal-type gastric cancer by Lauren classification showed increased IKK $\epsilon$  and TBK1 expression compared to undifferentiated and diffuse types. Expression of IKK $\epsilon$  and TBK1 was associated with earlier AJCC stage (based on AJCC seventh edition;  $p=0.019$  and  $p=0.003$ , respectively). Expression of IKK $\epsilon$  was observed in 16.7%, 15.9% and 10.2% of stage I, II, and III tumors, respectively. Expression of TBK1 was observed in 8.3%, 4.1% and 1.7% of stage I, II, and III tumors, respectively.

There was a significant association between IKK $\epsilon$  and TBK1 expression ( $p<0.001$ ), as 97.8% (936/957) of tumors with IKK $\epsilon$  negativity showed negative expression of TBK1 (Table 2).

### Co-expression of IKK and TBK1 in gastric cancer

We classified IKK $\epsilon$  and TBK1 expression status into four subgroups as follows: IKK $\epsilon$ -/TBK1- ( $n=936$ , 84.6%); IKK $\epsilon$ + /TBK1- ( $n=133$ , 12.0%); IKK $\epsilon$ -/TBK1+ ( $n=21$ , 1.9%); IKK $\epsilon$ + /TBK1+ ( $n=17$ , 1.5%) (Figure 1). Clinicopathological characteristics among these four groups were also evaluated (Table 3). Intestinal-type gastric cancer on Lauren classification and differentiated tumors were more frequent in the IKK $\epsilon$ + /TBK1+ subgroup than in the IKK $\epsilon$ - /TBK1- subgroup ( $p<0.001$  and  $p<0.001$ , respectively). Although N stage was not significantly associated with expression of IKK $\epsilon$  and TBK1, patients in the IKK $\epsilon$ + /TBK1+ subgroup were more likely to have earlier T stage and lower AJCC stage than those in the IKK $\epsilon$ - /TBK1- subgroup ( $p=0.011$  and  $p=0.002$ , respectively).

In univariate binary logistic regression analysis, several clinicopathologic variables were related to expression of IKK $\epsilon$ + /TBK1+, including intestinal and differentiated histologic types, earlier T stage, and earlier AJCC stage. Among these variables, histology type and AJCC stage were significant predictors in multivariate analysis. The adjusted odds ratio (OR) of differentiated histology was 4.579, with a 95% CI 1.669-12.566 when compared with undifferentiated histology. The ORs of AJCC stage I and stage II were 18.914 and 9.935 (95% CI, 1.995-165 and 1.283-76.913) when compared with stage III (Table 4).

### Prognostic significance of IKK and TBK1 co-expression in gastric cancer

Overall, the mean follow-up period was 79.8, 73.8 and 54.6 months in AJCC stage I, II, and III, respectively. During the follow-up periods, 10.4%, 25.4% and 59.9% of patients in stage I, II and III had a recurrence and 8.3%, 22.8% and 57.3% of patients in stage I, II and III died of their disease.

Patients in the IKK $\epsilon$ + /TBK1+ subgroup showed longer overall survival (mean=114.7 months; 95% CI 107.3-118.9) than those in the IKK $\epsilon$ - /TBK1- subgroup

**Table 1: The association of IKK and TBK1 expression and clinicopathological factors**

|                       |                  | IKK expression     |               |               | <i>P</i> -value | TBK1 expression |                | <i>P</i> -value |
|-----------------------|------------------|--------------------|---------------|---------------|-----------------|-----------------|----------------|-----------------|
|                       |                  | Total No. of cases | Positive      | Negative      |                 | Positive        | Negative       |                 |
|                       |                  | n=1107 (%)         | n=150 (13.6%) | n=957 (86.4%) |                 | n=38 (3.4%)     | n=1069 (96.6%) |                 |
| Gender                |                  |                    |               |               | 0.002           |                 | 0.076          |                 |
|                       | Male             | 725 (65.5%)        | 115 (15.9%)   | 610 (84.1%)   |                 | 30 (4.1%)       | 695 (95.9%)    |                 |
|                       | Female           | 382 (34.5%)        | 35 (9.2%)     | 347 (90.8%)   |                 | 8 (2.1%)        | 374 (97.9%)    |                 |
| Age (years)           |                  |                    |               |               | <0.001          |                 | 0.058          |                 |
|                       | <60              | 792 (71.5%)        | 88 (11.1%)    | 704 (88.9%)   |                 | 22 (2.8%)       | 770 (97.2%)    |                 |
|                       | ≥60              | 315 (28.5%)        | 62 (19.7%)    | 253 (80.3%)   |                 | 16 (5.1%)       | 299 (94.9%)    |                 |
| Tumor location        |                  |                    |               |               | 0.461           |                 | 0.382          |                 |
|                       | Upper third      | 117 (10.6%)        | 18 (15.4%)    | 99 (84.6%)    |                 | 1 (0.9%)        | 116 (99.1%)    |                 |
|                       | Middle third     | 315 (28.5%)        | 36 (11.4%)    | 279 (88.6%)   |                 | 10 (3.2%)       | 305 (96.8%)    |                 |
|                       | Lower third      | 626 (56.5%)        | 87 (13.9%)    | 539 (86.1%)   |                 | 25 (4.0%)       | 601 (96.0%)    |                 |
|                       | Whole            | 49 (4.4%)          | 9 (18.4%)     | 40 (81.6%)    |                 | 2 (4.1%)        | 47 (95.9%)     |                 |
| Lauren classification |                  |                    |               |               | <0.001          |                 | <0.001         |                 |
|                       | Intestinal       | 319 (28.8%)        | 72 (22.6%)    | 247 (77.4%)   |                 | 19 (6.0%)       | 300 (94.0%)    |                 |
|                       | Diffuse          | 766 (69.2%)        | 70 (9.1%)     | 696 (90.9%)   |                 | 16 (2.1%)       | 750 (97.9%)    |                 |
|                       | Mixed            | 22 (2.0%)          | 8 (36.4%)     | 14 (63.6%)    |                 | 3 (13.6%)       | 19 (86.4%)     |                 |
| Histology             |                  |                    |               |               | <0.001          |                 | 0.001          |                 |
|                       | Differentiated   | 303 (37.4%)        | 70 (23.1%)    | 233 (76.9%)   |                 | 19 (6.3%)       | 284 (93.7%)    |                 |
|                       | Undifferentiated | 804 (72.6%)        | 80 (10.0%)    | 724 (90.0%)   |                 | 19 (2.4%)       | 785 (97.6%)    |                 |
| T stage               |                  |                    |               |               | 0.081           |                 | 0.011          |                 |
|                       | T1               | 108 (9.8%)         | 19 (17.6%)    | 89 (82.4%)    |                 | 9 (8.3%)        | 99 (91.7%)     |                 |
|                       | T2               | 124 (11.2%)        | 22 (17.7%)    | 102 (82.3%)   |                 | 6 (4.8%)        | 118 (95.2%)    |                 |
|                       | T3               | 686 (62.0%)        | 92 (13.4%)    | 594 (86.6%)   |                 | 20 (2.9%)       | 666 (97.1%)    |                 |
|                       | T4               | 189 (17.1%)        | 17 (9.0%)     | 172 (91.0%)   |                 | 3 (1.6%)        | 186 (98.4%)    |                 |

(Continued)

|                            |     | IKK expression     |               |               | TBK1 expression |                |         |
|----------------------------|-----|--------------------|---------------|---------------|-----------------|----------------|---------|
|                            |     | Total No. of cases | Positive      | Negative      | Positive        | Negative       | P-value |
|                            |     | n=1107 (%)         | n=150 (13.6%) | n=957 (86.4%) | n=38 (3.4%)     | n=1069 (96.6%) |         |
| N stage                    |     |                    |               |               |                 | 0.109          | 0.233   |
|                            | N0  | 102 (9.2%)         | 10 (9.8%)     | 92 (90.2%)    | 3 (2.9%)        | 99 (97.1%)     |         |
|                            | N1  | 558 (50.4%)        | 89 (15.9%)    | 469 (84.1%)   | 25 (4.5%)       | 533 (95.5%)    |         |
|                            | N2  | 289 (26.1%)        | 35 (12.1%)    | 254 (87.9%)   | 8 (2.8%)        | 281 (97.2%)    |         |
|                            | N3  | 158 (14.3%)        | 16 (10.1%)    | 142 (89.9%)   | 2 (1.3%)        | 156 (98.7%)    |         |
| AJCC 7 <sup>th</sup> stage |     |                    |               |               |                 | 0.019          | 0.003   |
|                            | I   | 96 (8.7%)          | 16 (16.7%)    | 80 (83.3%)    | 8 (8.3%)        | 88 (91.7%)     |         |
|                            | II  | 540 (48.8%)        | 86 (15.9%)    | 454 (84.1%)   | 22 (4.1%)       | 518 (95.9%)    |         |
|                            | III | 471 (42.5%)        | 48 (10.2%)    | 423 (89.8%)   | 8 (1.7%)        | 463 (98.3%)    |         |
| Recurrence of disease      |     |                    |               |               |                 | 0.029          | 0.356   |
|                            | Yes | 429 (38.8%)        | 46 (10.7%)    | 383 (89.3%)   | 12 (2.8%)       | 417 (97.2%)    |         |
|                            | No  | 678 (61.2%)        | 104 (15.3%)   | 574 (84.7%)   | 26 (3.8%)       | 652 (96.2%)    |         |
| Death of disease           |     |                    |               |               |                 | 0.128          | 0.544   |
|                            | Yes | 401 (36.2%)        | 46 (11.5%)    | 355 (88.5%)   | 12 (3.0%)       | 389 (97.0%)    |         |
|                            | No  | 706 (63.8%)        | 104 (14.7%)   | 602 (85.3%)   | 26 (3.7%)       | 680 (96.3%)    |         |

**Table 2: Association between the IKK and TBK1 expression**

| Variable          | IKK expression   |                  | P-value |
|-------------------|------------------|------------------|---------|
|                   | Positive (n=150) | Negative (n=957) |         |
| TBK1 expression   |                  |                  | <0.001  |
| Positive (n=38)   | 17 (11.3%)       | 21 (2.2%)        |         |
| Negative (n=1069) | 133 (88.7%)      | 936 (97.8%)      |         |

(mean=113.2 months; 95% CI 108.7-117.8;  $p=0.125$ ), IKK $\epsilon$ + /TBK1- subgroup (mean=118.1 months; 95% CI 107.4-128.7;  $p=0.235$ ), and IKK $\epsilon$ - /TBK1+ subgroup (mean=98.1 months; 95% CI 71.5-124.7;  $p=0.094$ ). The IKK $\epsilon$ + /TBK1+ subgroup showed longer disease-free survival (mean 125.8 months; 95% CI 101.5-150.0) than the IKK $\epsilon$ - /TBK1- subgroup (mean=105.1 months; 95% CI 100.1-110.1;  $p=0.104$ ), IKK $\epsilon$  + /TBK1- subgroup (mean=104.6 months; 95% CI 93.7-115.5;  $p=0.240$ ),

and IKK $\epsilon$ - /TBK1+ subgroup (mean=94.6 months; 95% CI 66.1-123.0;  $p=0.110$ ). When survival curves were compared by log-rank test in Kaplan-Meier survival analyses, there were no survival differences in relation to expression of IKK $\epsilon$  or TBK1. However, the survival curve of the IKK $\epsilon$ + /TBK1+ subgroup varied from those of other groups, although this did not reach statistical significance due to the small number of events in the IKK $\epsilon$ + /TBK1+ subgroup (Figure 2).



## DISCUSSION

Our study sought to investigate IKK $\epsilon$  and TBK1 expression in gastric cancer and their role in prognosis. We identified IKK $\epsilon$  and TBK1 expression in 13.6% and 3.4% of gastric cancers, respectively, and co-expression of IKK $\epsilon$  and TBK1 in 1.5% of cases. Our findings suggest that IKK $\epsilon$  and TBK1 may be good molecular target candidates, warranting future study to elucidate the underlying common regulatory mechanism.

Identifying specific biomarkers for patient selection and effective pathway inhibition is a key element in the development of targeted therapies. In particular, kinase oncogenes may be attractive therapeutic targets. IKK $\epsilon$  and TBK1 are serine/threonine protein kinases belonging to the IKK family. Although IKK $\epsilon$  and TBK1 exhibit differential expression patterns, they share the kinase domain and are similar in their ability to activate the NF- $\kappa$ B signaling pathway. NF- $\kappa$ B signaling pathway activation may be related to distinct mechanisms in different tumor types. Basically, NF- $\kappa$ Bs affect cell survival and proliferation in cancer by inducing expression of genes coding for key anti-apoptotic proteins, such as Bcl-2 and IAP-1/2 and mitogenic genes, such as myc and cyclin-D. Hence, the function of the NF- $\kappa$ B signaling pathway is to protect cancer cells from apoptosis and drive their proliferation. Finally, IKK $\epsilon$  and TBK1 are kinase oncogenes. Previous studies revealed that IKK $\epsilon$  and TBK1 play a significant role in several cancers. Boehm et al. showed that IKK $\epsilon$  is amplified and overexpressed in a breast cancer cell line and human breast cancer tissue [7]. Guo et al. recently

showed that overexpression of IKK $\epsilon$  in ovarian cancer was associated with late-stage and high-grade tumors [11]. Recently, Deng et al. [23] reported that patients with HER2-positive breast cancer may benefit from anti-TBK1/IKK $\epsilon$  plus anti-HER2 combination therapies. TBK1/IKK $\epsilon$  inhibition promoted cellular senescence by suppressing p65-NF- $\kappa$ B and inducing p16Ink4a. Although IKK $\epsilon$  is not essential for growth of mouse Her2/Neu tumor cells, shRNA-mediated knockdown of TBK1 alone efficiently inhibited growth of both mouse and human HER2-positive breast cancer cells. Thus, TBK1 could be critical for survival and growth of tumors with HER2 amplification [23].

The oncogenic potential of IKK $\epsilon$  and TBK1 indicate these proteins to be possible therapeutic targets. TBK1/IKK $\epsilon$  inhibitors have shown low specificity, as they have multiple targets such as PDK1, JNK and p38 MAP kinases [24, 25]. Recently, Reilly et al. [26] discovered a small molecule inhibitor of IKK $\epsilon$  and TBK1 kinases called amlexanox, which has been shown to selectively inhibit both IKK $\epsilon$  and TBK1.

In our study, the multivariate binary logistic regression model was applied to determine prediction factors for IKK $\epsilon$ +/TBK1+ expression in gastric cancer. Multivariate analysis showed that tissues with differentiated histology and earlier AJCC stage were correlated with IKK $\epsilon$ +/TBK1+ expression. The frequency of IKK $\epsilon$  and TBK1 co-expression was relatively high in early T stage, suggesting that alteration of IKK $\epsilon$  and TBK1 could be more involved in the development of gastric cancer. Furthermore, co-expression of IKK $\epsilon$  and TBK1 was associated with more differentiated histology, namely,

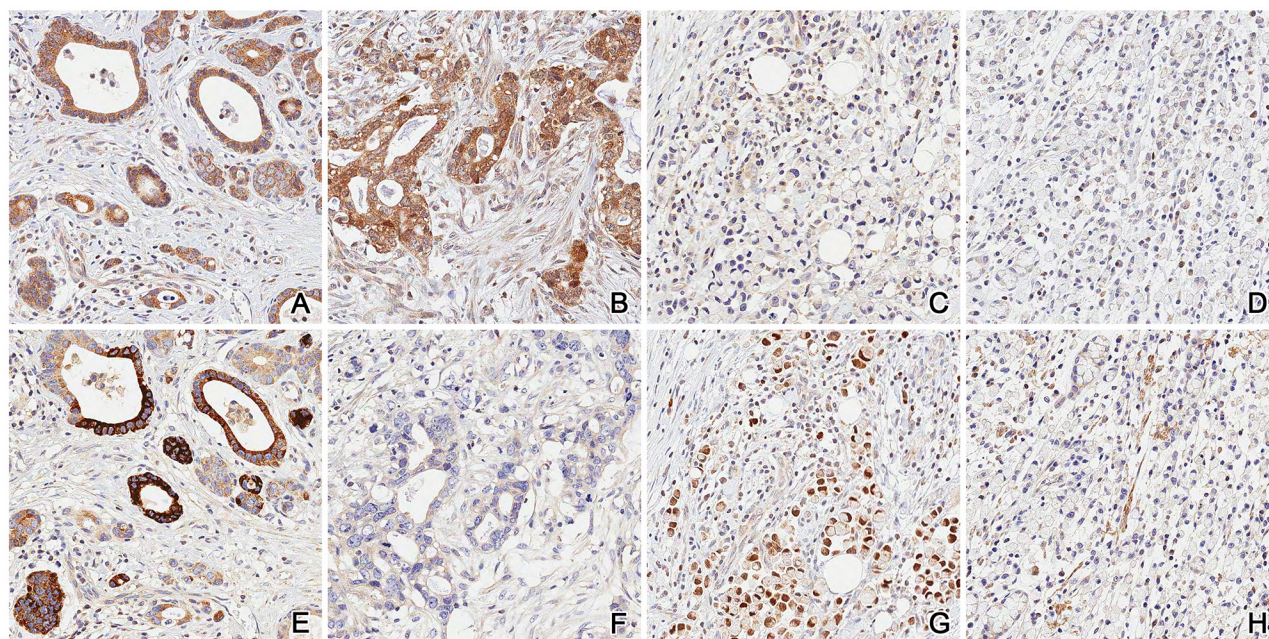

**Figure 1:** Representative examples of the four subgroups A. & E. IKK+/TBK1+; B. & F. IKK+/TBK1-; C. & G. IKK-/TBK1+; D. & H. IKK-/TBK1-.

**Table 3: The association of co-expressions of IKK and TBK1 and clinicopathological factors**

|                            |                  | IKK-/TBK1-       | IKK+/TBK1-       | IKK-/TBK1+  | IKK+/TBK1+  | P – value |
|----------------------------|------------------|------------------|------------------|-------------|-------------|-----------|
|                            |                  | N=936<br>(84.6%) | N=133<br>(12.0%) | N=21 (1.9%) | N=17 (1.5%) |           |
| Gender                     |                  |                  |                  |             |             | 0.01      |
|                            | Male             | 594 (81.9%)      | 101 (13.9%)      | 16 (2.2%)   | 14 (1.9%)   |           |
|                            | Female           | 342 (89.5%)      | 32 (8.4%)        | 5 (1.3%)    | 3 (0.8%)    |           |
| Age (years)                |                  |                  |                  |             |             | 0.001     |
|                            | <60              | 691 (87.2%)      | 79 (10.0%)       | 13 (1.6%)   | 9 (1.1%)    |           |
|                            | ≥60              | 245 (77.8%)      | 54 (17.1%)       | 8 (2.5%)    | 8 (2.5%)    |           |
| Tumor location             |                  |                  |                  |             |             | 0.382     |
|                            | Upper third      | 99 (84.6%)       | 17 (14.5%)       | 0 (0%)      | 1 (0.9%)    |           |
|                            | Middle third     | 275 (87.3%)      | 30 (9.5%)        | 4 (1.3%)    | 6 (1.9%)    |           |
|                            | Lower third      | 524 (83.7%)      | 77 (12.3%)       | 15 (2.4%)   | 10 (1.6%)   |           |
|                            | Whole            | 38 (77.6%)       | 9 (18.4%)        | 2 (4.1%)    | 0 (0%)      |           |
| Lauren classification      |                  |                  |                  |             |             | <0.001    |
|                            | Intestinal       | 238 (74.6%)      | 62 (19.4%)       | 9 (2.8%)    | 10 (3.1%)   |           |
|                            | Diffuse          | 685 (89.4%)      | 65 (8.5%)        | 11 (1.4%)   | 5 (0.7%)    |           |
|                            | Mixed            | 13 (59.1%)       | 6 (27.3%)        | 1 (4.5%)    | 2 (9.1%)    |           |
| Histology                  |                  |                  |                  |             |             | <0.001    |
|                            | Differentiated   | 225 (74.3%)      | 59 (19.5%)       | 8 (2.6%)    | 11 (3.6%)   |           |
|                            | Undifferentiated | 711 (88.4%)      | 74 (9.2%)        | 13 (1.6%)   | 6 (0.7%)    |           |
| T stage                    |                  |                  |                  |             |             | 0.011     |
|                            | T1               | 85 (78.7%)       | 14 (13.0%)       | 4 (3.7%)    | 5 (4.6%)    |           |
|                            | T2               | 100 (80.6%)      | 18 (14.5%)       | 2 (1.6%)    | 4 (3.2%)    |           |
|                            | T3               | 581 (84.7%)      | 85 (12.4%)       | 13 (1.9%)   | 7 (1.0%)    |           |
|                            | T4               | 170 (89.9%)      | 16 (8.5%)        | 2 (1.1%)    | 1 (0.5%)    |           |
| N stage                    |                  |                  |                  |             |             | 0.069*    |
|                            | N0               | 90 (88.2%)       | 9 (8.8%)         | 2 (2.0%)    | 1 (1.0%)    |           |
|                            | N1               | 457 (81.9%)      | 76 (13.6%)       | 12 (2.2%)   | 13 (2.3%)   |           |
|                            | N2               | 248 (85.8%)      | 33 (11.4%)       | 6 (2.1%)    | 2 (0.7%)    |           |
|                            | N3               | 141 (89.2%)      | 15 (9.5%)        | 1 (0.6%)    | 1 (0.6%)    |           |
| AJCC 7 <sup>th</sup> stage |                  |                  |                  |             |             | 0.002     |
|                            | I                | 76 (8.1%)        | 12 (9.0%)        | 4 (19.0%)   | 4 (23.5%)   |           |
|                            | II               | 444 (47.4%)      | 74 (55.6%)       | 10 (47.6%)  | 12 (70.6%)  |           |
|                            | III              | 416 (44.4%)      | 47 (35.3%)       | 7 (33.3%)   | 1 (5.9%)    |           |
| Recurrence of disease      |                  |                  |                  |             |             | 0.101     |
|                            | Yes              | 374 (87.2%)      | 43 (10.0%)       | 9 (1.8%)    | 3 (0.7%)    |           |
|                            | No               | 562 (82.9%)      | 90 (13.3%)       | 12 (2.1%)   | 14 (2.1%)   |           |

(Continued)

|                  |     | IKK-/TBK1-<br>N=936<br>(84.6%) | IKK+/TBK1-<br>N=133<br>(12.0%) | IKK-/TBK1+<br>N=21 (1.9%) | IKK+/TBK1+<br>N=17 (1.5%) | P - value |
|------------------|-----|--------------------------------|--------------------------------|---------------------------|---------------------------|-----------|
| Death of disease |     |                                |                                |                           |                           | 0.258     |
|                  | Yes | 346 (86.3%)                    | 43 (10.7%)                     | 9 (2.2%)                  | 3 (0.7%)                  |           |
|                  | No  | 590 (83.6%)                    | 90 (12.7%)                     | 12 (1.7%)                 | 14 (2.0%)                 |           |

**Table 4: Multivariate analysis of clinicopathological factors for co-expression of IKK/TBK1 in gastric cancer**

|                  | Odds ratio | 95% CI          | P - value |
|------------------|------------|-----------------|-----------|
| Histology        |            |                 | 0.003     |
| Undifferentiated | 1.000      |                 |           |
| Differentiated   | 4.579      | 1.669 - 12.566  |           |
| AJCC 7th stage   |            |                 | 0.037     |
| Stage I          | 18.194     | 1.995 - 165.910 | 0.010     |
| Stage II         | 9.935      | 1.283 - 76.913  | 0.028     |
| Stage III        | 1.000      |                 |           |

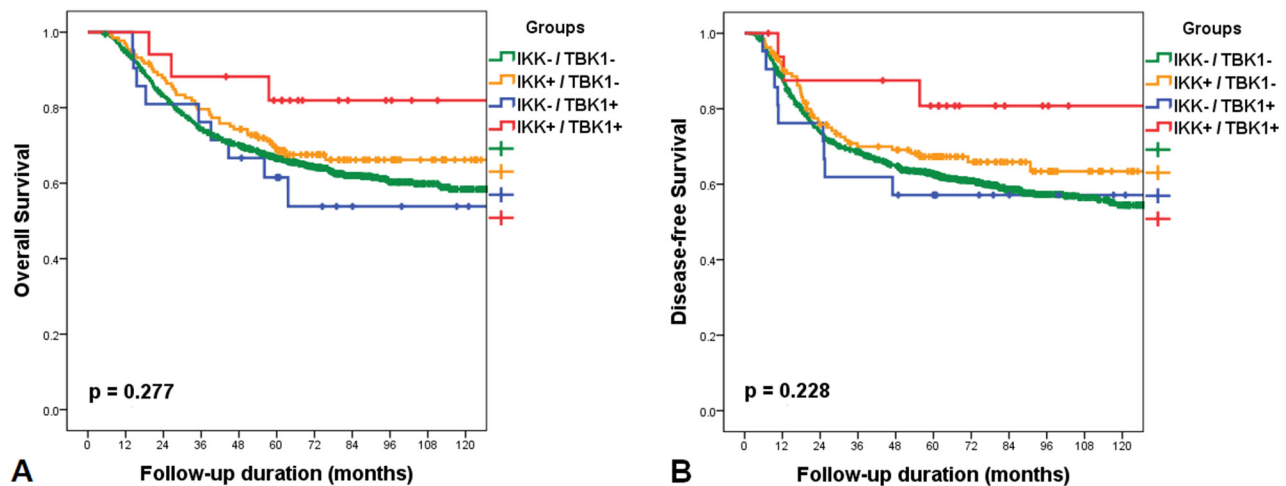

**Figure 2: Kaplan-Meier survival curves with log-rank test of overall survival after classification into the following four subgroups: IKK-/TBK1-; IKK+/TBK1-; IKK-/TBK1+; IKK+/TBK1+. The survival curve of the IKK+/TBK1+ subgroup was different from those of other groups, but this difference was not statistically significant.**

intestinal-type gastric cancer. In this study, patients in the IKKε+/TBK1+ subgroup had a longer life span. Co-expression of IKKε and TBK1 was more frequent in early T stage tumors and those with more differentiated (intestinal-type) histology, which might have been related to good prognosis.

Recent studies have classified four major genomic groups of gastric cancer on a molecular and genomic basis: EBV-infected tumors, those with microsatellite instability, genomically-stable tumors, and those with chromosomal instability. Chromosomal-instability tumors were of the

intestinal histology type [27]. Recently, we also classified gastric cancer into four molecular subtypes, which are closely associated with distinct clinical outcomes [28]. However, traditionally, gastric cancer is divided into two main subtypes on the basis of Lauren classification—intestinal and diffuse. These subtypes have different molecular pathogenesis. In the intestinal type, multistep progression initiated by *Helicobacter pylori* infection is associated with pathogenesis. Preferentially altered genes include *KRAS* and *HER2*, which are overexpressed in about 20% of gastric cancer [29–32]. Diffuse-type gastric cancer does not arise from step-wise



progression and is associated with loss of cell cohesion due to biallelic inactivation of *CDH1*. Sporadically altered genes include *BCL2* and *FGFR2* in diffuse-type gastric carcinomas [33–36]. We demonstrated that alteration of IKK $\epsilon$  and TBK1, albeit small, may be involved in the pathogenesis of intestinal-type gastric cancer. Thus, testing for IKK $\epsilon$  and TBK1 overexpression should be considered in certain patients, such as those with intestinal-type gastric cancer.

We did not observe statistically significant survival differences between the four IKK $\epsilon$  and TBK1 expression subgroups. However, the survival curve of the IKK $\epsilon$ + / TBK1+ subgroup varied compared to other groups. This finding may be due to the small number of events in the IKK $\epsilon$ + / TBK1+ subgroup. Our results do not agree with those of several previous studies. This discrepancy could be due to the differing roles of *IKK $\epsilon$*  and *TBK1* in gastric cancer or the small number of positive cases. Further investigation is needed to determine its role in gastric carcinogenesis.

To the best of our knowledge, this is the first large-scale study investigating the relationship between the expression of IKK $\epsilon$  and TBK1 and clinicopathologic features of gastric cancer. We determined the expression of IKK $\epsilon$  and TBK1, and co-expression of IKK $\epsilon$  and TBK1 was associated with differentiated intestinal histology and earlier tumor stage. The role of IKK $\epsilon$  and TBK1 in intestinal-type gastric cancer pathogenesis should be elucidated by further study.

## MATERIALS AND METHODS

### Patients

Gastric cancer tissue samples were retrospectively collected from 1,107 patients (stages IB to IVa) who underwent R0 gastrectomy with extensive node dissection (D2) and adjuvant chemoradiation therapy (INT-0116 regimen) [20, 21] from 2000 to 2008 at Samsung Medical Center in Seoul, Korea. Clinicopathological characteristics obtained from medical records included sex, age, tumor size, tumor location, histological type, Lauren classification, and differentiation grade. Tumor histology was classified into 2 groups: differentiated, which included well- or moderately-differentiated tubular and papillary adenocarcinomas, and undifferentiated, which included poorly-differentiated adenocarcinomas and signet ring cell carcinomas.

### Immunohistochemistry

For tissue microarray, we reviewed all H&E-stained slides and representative histological areas were carefully selected and marked on paraffin blocks. From each paraffin block, four primary gastric cancer tissue cores (diameter = 0.6 mm) were taken from the invasive front, both lateral sides, and the luminal surface area of the tumor using AccuMax (IsuAbxis, Seoul, Korea) as previously described [22]. Immunohistochemistry was performed on formalin-

fixed, paraffin-embedded, 4- $\mu$ m-thick tissue sections using rabbit monoclonal antibody IKK $\epsilon$  (D20G4, Cell Signaling Technology, Danvers, MA, USA, 1:50 dilution) and TBK1/NAK (D1B4, Cell Signaling Technology, Danvers, MA, USA, 1:200 dilution). For IKK $\epsilon$ , we incubated primary antibody overnight at 4°C and used a DAKO Envision™ Detection Kit (DAKO, Glostrup, Denmark) for 30 minutes. For TBK1, we incubated primary antibody for 15 minutes with Bond-max autoimmunostainer (Leica Biosystem, Melbourne, Australia) using Bond™ Polymer refine detection (DS9800, Vision Biosystems, Melbourne, Australia) according to the manufacturer's protocol. For the interpretation of IKK $\epsilon$  and TBK1 Immunohistochemistry, strong, distinct cytoplasmic staining with membranous accentuation was considered positive.

### Statistical analysis

Statistical analysis was performed by SPSS 19.0 for Windows (SPSS, Chicago, IL, USA). Categorical variables were compared using Pearson's chi-squared test or Fisher's exact test, and continuous variables, which are presented as means  $\pm$  SD, using the t-test. Factors found to be significant ( $p < 0.05$ ) in univariate analysis were included in subsequent multivariate logistic regression analysis to identify independent variables associated with IKK and TBK1 expression. Disease-free survival was defined as the time from surgery to first relapse. The Kaplan–Meier method was used to calculate disease-free and overall survival, and survival curves were compared by log-rank test. All tests were two sided, and  $p$  values  $< 0.05$  were considered statistically significant.

## ACKNOWLEDGMENTS

This research was supported by a grant from the 20 by 20 project of Samsung Medical Center (GF01140111).

## CONFLICTS OF INTEREST

The authors declare no conflicts of interest.

## REFERENCES

1. Shen RR and Hahn WC. Emerging roles for the non-canonical IKKs in cancer. *Oncogene*. 2011; 30: 631-641.
2. Verhelst K, Verstrepen L, Carpentier I and Beyaert R. I $\kappa$ B kinase epsilon (IKKepsilon): a therapeutic target in inflammation and cancer. *Biochem Pharmacol*. 2013; 85: 873-880.
3. Bonnard M, Mirtos C, Suzuki S, Graham K, Huang J, Ng M, Itie A, Wakeham A, Shahinian A, Henzel WJ, Elia AJ, Shillinglaw W, Mak TW, et al. Deficiency of T2K leads to apoptotic liver degeneration and impaired NF-kappaB-dependent gene transcription. *EMBO J*. 2000; 19: 4976-4985.



4. Hemmi H, Takeuchi O, Sato S, Yamamoto M, Kaisho T, Sanjo H, Kawai T, Hoshino K, Takeda K and Akira S. The roles of two IkappaB kinase-related kinases in lipopolysaccharide and double stranded RNA signaling and viral infection. *J Exp Med.* 2004; 199: 1641-1650.
5. Clement JF, Meloche S and Servant MJ. The IKK-related kinases: from innate immunity to oncogenesis. *Cell Res.* 2008; 18: 889-899.
6. Barbie DA, Tamayo P, Boehm JS, Kim SY, Moody SE, Dunn IF, Schinzel AC, Sandy P, Meylan E, Scholl C, Frohling S, Chan EM, Sos ML, et al. Systematic RNA interference reveals that oncogenic KRAS-driven cancers require TBK1. *Nature.* 2009; 462: 108-112.
7. Boehm JS, Zhao JJ, Yao J, Kim SY, Firestein R, Dunn IF, Sjostrom SK, Garraway LA, Weremowicz S, Richardson AL, Greulich H, Stewart CJ, Mulvey LA, et al. Integrative genomic approaches identify IKBKE as a breast cancer oncogene. *Cell.* 2007; 129: 1065-1079.
8. Chien Y, Kim S, Bumeister R, Loo YM, Kwon SW, Johnson CL, Balakireva MG, Romeo Y, Kopelovich L, Gale M, Jr., Yeaman C, Camonis JH, Zhao Y, et al. RalB GTPase-mediated activation of the IkappaB family kinase TBK1 couples innate immune signaling to tumor cell survival. *Cell.* 2006; 127: 157-170.
9. Shimada T, Kawai T, Takeda K, Matsumoto M, Inoue J, Tatsumi Y, Kanamaru A and Akira S. IKK-i, a novel lipopolysaccharide-inducible kinase that is related to IkappaB kinases. *Int Immunol.* 1999; 11: 1357-1362.
10. Larabi A, Devos JM, Ng SL, Nanao MH, Round A, Maniatis T and Panne D. Crystal structure and mechanism of activation of TANK-binding kinase 1. *Cell Rep.* 2013; 3: 734-746.
11. Guo JP, Shu SK, He L, Lee YC, Kruk PA, Grenman S, Nicosia SV, Mor G, Schell MJ, Coppola D and Cheng JQ. Deregulation of IKBKE is associated with tumor progression, poor prognosis, and cisplatin resistance in ovarian cancer. *Am J Pathol.* 2009; 175: 324-333.
12. Hsu S, Kim M, Hernandez L, Grajales V, Noonan A, Anver M, Davidson B and Annunziata CM. IKK-epsilon coordinates invasion and metastasis of ovarian cancer. *Cancer Res.* 2012; 72: 5494-5504.
13. Qin B and Cheng K. Silencing of the IKKepsilon gene by siRNA inhibits invasiveness and growth of breast cancer cells. *Breast Cancer Res.* 2010; 12: R74.
14. Kang MR, Kim MS, Kim SS, Ahn CH, Yoo NJ and Lee SH. NF-kappaB signalling proteins p50/p105, p52/p100, RelA, and IKKepsilon are over-expressed in oesophageal squamous cell carcinomas. *Pathology.* 2009; 41: 622-625.
15. Seo SI, Song SY, Kang MR, Kim MS, Oh JE, Kim YR, Lee JY, Yoo NJ and Lee SH. Immunohistochemical analysis of NF-kappaB signaling proteins IKKepsilon, p50/p105, p52/p100 and RelA in prostate cancers. *APMIS.* 2009; 117: 623-628.
16. Kim JY, Welsh EA, Oguz U, Fang B, Bai Y, Kinose F, Bronk C, Remsing Rix LL, Beg AA, Rix U, Eschrich SA, Koomen JM and Haura EB. Dissection of TBK1 signaling via phosphoproteomics in lung cancer cells. *Proc Natl Acad Sci U S A.* 2013; 110: 12414-12419.
17. Kim JY, Beg AA and Haura EB. Non-canonical IKKs, IKK and TBK1, as novel therapeutic targets in the treatment of non-small cell lung cancer. *Expert Opin Ther Targets.* 2013; 17: 1109-1112.
18. Korherr C, Gille H, Schafer R, Koenig-Hoffmann K, Dixelius J, Eglund KA, Pastan I and Brinkmann U. Identification of proangiogenic genes and pathways by high-throughput functional genomics: TBK1 and the IRF3 pathway. *Proc Natl Acad Sci U S A.* 2006; 103: 4240-4245.
19. Ou YH, Torres M, Ram R, Formstecher E, Roland C, Cheng T, Brekken R, Wurz R, Tasker A, Polverino T, Tan SL and White MA. TBK1 directly engages Akt/PKB survival signaling to support oncogenic transformation. *Mol Cell.* 2011; 41: 458-470.
20. Macdonald JS, Smalley SR, Benedetti J, Hundahl SA, Estes NC, Stemmermann GN, Haller DG, Ajani JA, Gunderson LL, Jessup JM and Martenson JA. Chemoradiotherapy after surgery compared with surgery alone for adenocarcinoma of the stomach or gastroesophageal junction. *N Engl J Med.* 2001; 345: 725-730.
21. Kim S, Lim DH, Lee J, Kang WK, MacDonald JS, Park CH, Park SH, Lee SH, Kim K, Park JO, Kim WS, Jung CW, Park YS, et al. An observational study suggesting clinical benefit for adjuvant postoperative chemoradiation in a population of over 500 cases after gastric resection with D2 nodal dissection for adenocarcinoma of the stomach. *Int J Radiat Oncol Biol Phys.* 2005; 63: 1279-1285.
22. Ha SY, Lee J, Kang SY, Do IG, Ahn S, Park JO, Kang WK, Choi MG, Sohn TS, Bae JM, Kim S, Kim M, Kim S, et al. MET overexpression assessed by new interpretation method predicts gene amplification and poor survival in advanced gastric carcinomas. *Mod Pathol.* 2013; 26: 1632-1641.
23. Deng T, Liu JC, Chung PE, Uehling D, Aman A, Joseph B, Ketela T, Jiang Z, Schachter NF, Rottapel R, Egan SE, Al-Awar R, Moffat J, et al. shRNA kinome screen identifies TBK1 as a therapeutic target for HER2+ breast cancer. *Cancer Res.* 2014; 74: 2119-2130.
24. Clark K, Peggie M, Plater L, Sorcek RJ, Young ER, Madwed JB, Hough J, McIver EG and Cohen P. Novel cross-talk within the IKK family controls innate immunity. *Biochem J.* 2011; 434: 93-104.
25. Clark K, Plater L, Peggie M and Cohen P. Use of the pharmacological inhibitor BX795 to study the regulation and physiological roles of TBK1 and IkappaB kinase epsilon: a distinct upstream kinase mediates Ser-172 phosphorylation and activation. *J Biol Chem.* 2009; 284: 14136-14146.
26. Reilly SM, Chiang SH, Decker SJ, Chang L, Uhm M, Larsen MJ, Rubin JR, Mowers J, White NM, Hochberg I, Downes M, Yu RT, Liddle C, et al. An inhibitor of the protein kinases TBK1 and IKK-varepsilon improves

- obesity-related metabolic dysfunctions in mice. *Nat Med*. 2013; 19: 313-321.
27. Cancer Genome Atlas Research N. Comprehensive molecular characterization of gastric adenocarcinoma. *Nature*. 2014; 513: 202-209.
  28. Cristescu R, Lee J, Nebozhyn M, Kim KM, Ting JC, Wong SS, Liu J, Yue YG, Wang J, Yu K, Ye XS, Do IG, Liu S, et al. Molecular analysis of gastric cancer identifies subtypes associated with distinct clinical outcomes. *Nat Med*. 2015; 21: 449-456.
  29. Ruschoff J, Dietel M, Baretton G, Arbogast S, Walch A, Monges G, Chenard MP, Penault-Llorca F, Nagelmeier I, Schlake W, Hofler H and Kreipe HH. HER2 diagnostics in gastric cancer-guideline validation and development of standardized immunohistochemical testing. *Virchows Arch*. 2010; 457: 299-307.
  30. Barros-Silva JD, Leitao D, Afonso L, Vieira J, Dinis-Ribeiro M, Fragoso M, Bento MJ, Santos L, Ferreira P, Rego S, Brandao C, Carneiro F, Lopes C, et al. Association of ERBB2 gene status with histopathological parameters and disease-specific survival in gastric carcinoma patients. *Br J Cancer*. 2009; 100: 487-493.
  31. Oda N, Tsujino T, Tsuda T, Yoshida K, Nakayama H, Yasui W and Tahara E. DNA ploidy pattern and amplification of ERBB and ERBB2 genes in human gastric carcinomas. *Virchows Arch B Cell Pathol Incl Mol Pathol*. 1990; 58: 273-277.
  32. Varis A, Zaika A, Puolakkainen P, Nagy B, Madrigal I, Kokkola A, Vayrynen A, Karkkainen P, Moskaluk C, El-Rifai W and Knuutila S. Coamplified and overexpressed genes at ERBB2 locus in gastric cancer. *Int J Cancer*. 2004; 109: 548-553.
  33. Ayhan A, Yasui W, Yokozaki H, Seto M, Ueda R and Tahara E. Loss of heterozygosity at the bcl-2 gene locus and expression of bcl-2 in human gastric and colorectal carcinomas. *Jpn J Cancer Res*. 1994; 85: 584-591.
  34. Hattori Y, Odagiri H, Nakatani H, Miyagawa K, Naito K, Sakamoto H, Katoh O, Yoshida T, Sugimura T and Terada M. K-sam, an amplified gene in stomach cancer, is a member of the heparin-binding growth factor receptor genes. *Proc Natl Acad Sci U S A*. 1990; 87: 5983-5987.
  35. Lee HK, Lee HS, Yang HK, Kim WH, Lee KU, Choe KJ and Kim JP. Prognostic significance of Bcl-2 and p53 expression in gastric cancer. *Int J Colorectal Dis*. 2003; 18: 518-525.
  36. Smith MG, Hold GL, Tahara E and El-Omar EM. Cellular and molecular aspects of gastric cancer. *World J Gastroenterol*. 2006; 12: 2979-2990.
